# Supplementary material for: Comparative Evaluation of the Immune Responses in Cattle Mammary Tissues Naturally Infected with Bovine Parainfluenza Virus Type 3 and Bovine Alphaherpesvirus-1
Source: MDPI journal article supplement (doi:10.3390/pathogens8010026), 2019-02-25
Supplement: s1 [file s1]

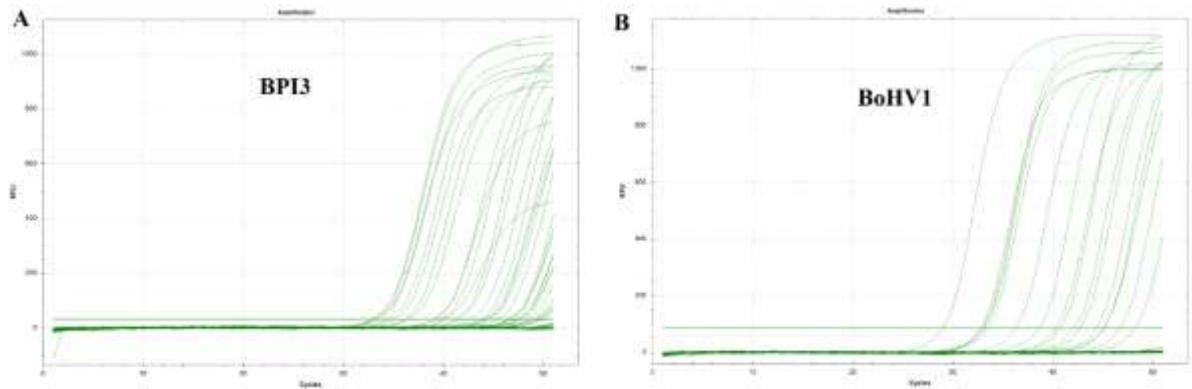

**Figure S1.** BPIV-3 and BoHV-1 nucleic acid signals. (A) BPIV-3. (B) BoHV-1.

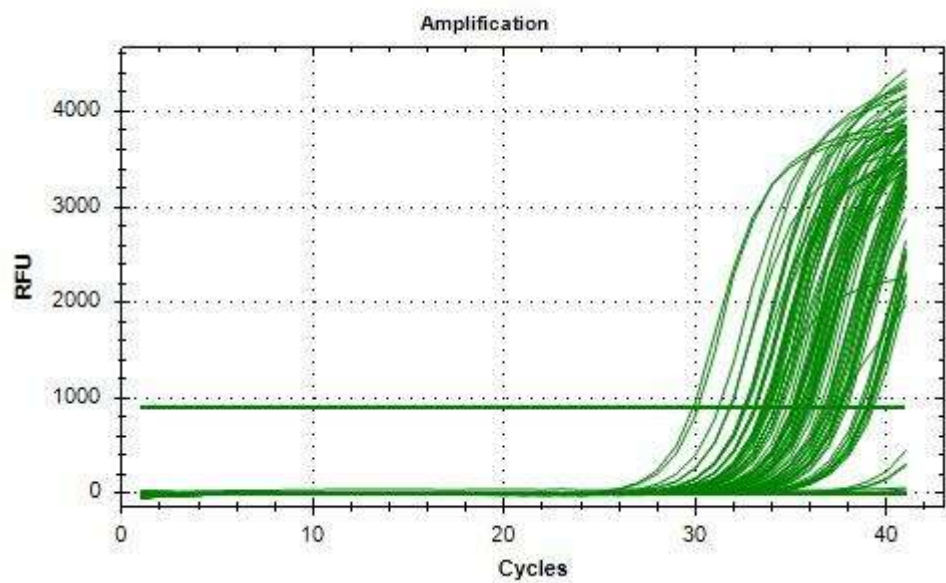

**Figure S2.**  $\beta$ -actin amplification signals for all tissues.

**Table S1.** The Ct/Cq values of BoHV-1 and BPIV-3 for 120 samples.

| Sample    | Cq BoHV-1 | Cq BPIV-3 |
|-----------|-----------|-----------|
| Sample 1  | N/A       | N/A       |
| Sample 2  | N/A       | N/A       |
| Sample 3  | N/A       | N/A       |
| Sample 4  | 26.35     | 30.01     |
| Sample 5  | N/A       | N/A       |
| Sample 6  | 26.16     | N/A       |
| Sample 7  | N/A       | N/A       |
| Sample 8  | N/A       | N/A       |
| Sample 9  | N/A       | 31.58     |
| Sample 10 | N/A       | N/A       |
| Sample 11 | 27.52     | 35.21     |
| Sample 12 | 26.01     | N/A       |
| Sample 13 | N/A       | N/A       |
| Sample 14 | N/A       | 30.12     |

|           |       |       |
|-----------|-------|-------|
| Sample 15 | N/A   | N/A   |
| Sample 16 | N/A   | 30.54 |
| Sample 17 | N/A   | N/A   |
| Sample 18 | N/A   | N/A   |
| Sample 19 | N/A   | N/A   |
| Sample 20 | N/A   | 33.25 |
| Sample 21 | N/A   | N/A   |
| Sample 22 | N/A   | N/A   |
| Sample 23 | N/A   | 35.62 |
| Sample 24 | N/A   | N/A   |
| Sample 25 | N/A   | N/A   |
| Sample 26 | N/A   | N/A   |
| Sample 27 | N/A   | N/A   |
| Sample 28 | N/A   | N/A   |
| Sample 29 | 31.26 | 32.26 |
| Sample 30 | N/A   | N/A   |
| Sample 31 | N/A   | N/A   |
| Sample 32 | N/A   | 33.52 |
| Sample 33 | N/A   | N/A   |
| Sample 34 | N/A   | N/A   |
| Sample 35 | N/A   | N/A   |
| Sample 36 | N/A   | 32.02 |
| Sample 37 | 33.04 | N/A   |
| Sample 38 | N/A   | N/A   |
| Sample 39 | N/A   | N/A   |
| Sample 40 | N/A   | N/A   |
| Sample 41 | N/A   | N/A   |
| Sample 42 | N/A   | N/A   |
| Sample 43 | 34.05 | 34.05 |
| Sample 44 | N/A   | N/A   |
| Sample 45 | N/A   | N/A   |
| Sample 46 | N/A   | N/A   |
| Sample 47 | 26.58 | 30.02 |
| Sample 48 | N/A   | N/A   |
| Sample 49 | N/A   | N/A   |
| Sample 50 | N/A   | N/A   |
| Sample 51 | 28.69 | 32.14 |
| Sample 52 | N/A   | N/A   |
| Sample 53 | N/A   | N/A   |
| Sample 54 | N/A   | N/A   |
| Sample 55 | 30.24 | 30.24 |
| Sample 56 | N/A   | N/A   |
| Sample 57 | N/A   | N/A   |
| Sample 58 | N/A   | N/A   |
| Sample 59 | N/A   | N/A   |
| Sample 60 | N/A   | 33.01 |
| Sample 61 | N/A   | N/A   |
| Sample 62 | N/A   | N/A   |
| Sample 63 | N/A   | N/A   |
| Sample 64 | N/A   | N/A   |

|            |       |       |
|------------|-------|-------|
| Sample 65  | N/A   | 35.47 |
| Sample 66  | N/A   | N/A   |
| Sample 67  | N/A   | N/A   |
| Sample 68  | N/A   | 33.26 |
| Sample 69  | N/A   | N/A   |
| Sample 70  | N/A   | N/A   |
| Sample 71  | N/A   | 31.28 |
| Sample 72  | N/A   | N/A   |
| Sample 73  | N/A   | N/A   |
| Sample 74  | N/A   | N/A   |
| Sample 75  | N/A   | 35.54 |
| Sample 76  | N/A   | N/A   |
| Sample 77  | N/A   | N/A   |
| Sample 78  | N/A   | N/A   |
| Sample 79  | N/A   | 34.57 |
| Sample 80  | N/A   | N/A   |
| Sample 81  | N/A   | N/A   |
| Sample 82  | N/A   | N/A   |
| Sample 83  | N/A   | N/A   |
| Sample 84  | 31.04 | 35.61 |
| Sample 85  | N/A   | N/A   |
| Sample 86  | N/A   | N/A   |
| Sample 87  | N/A   | N/A   |
| Sample 88  | N/A   | N/A   |
| Sample 89  | N/A   | N/A   |
| Sample 90  | N/A   | N/A   |
| Sample 91  | N/A   | N/A   |
| Sample 92  | N/A   | 38.54 |
| Sample 93  | 34.16 | N/A   |
| Sample 94  | N/A   | N/A   |
| Sample 95  | N/A   | N/A   |
| Sample 96  | N/A   | N/A   |
| Sample 97  | N/A   | N/A   |
| Sample 98  | N/A   | N/A   |
| Sample 99  | N/A   | N/A   |
| Sample 100 | N/A   | 30.12 |
| Sample 101 | N/A   | N/A   |
| Sample 102 | N/A   | N/A   |
| Sample 103 | N/A   | N/A   |
| Sample 104 | N/A   | N/A   |
| Sample 105 | N/A   | N/A   |
| Sample 106 | N/A   | N/A   |
| Sample 107 | N/A   | N/A   |
| Sample 108 | N/A   | N/A   |
| Sample 109 | N/A   | N/A   |
| Sample 110 | N/A   | 35.58 |
| Sample 111 | N/A   | N/A   |
| Sample 112 | N/A   | N/A   |
| Sample 113 | 31.12 | N/A   |
| Sample 114 | N/A   | N/A   |

|            |     |       |
|------------|-----|-------|
| Sample 115 | N/A | N/A   |
| Sample 116 | N/A | N/A   |
| Sample 117 | N/A | 30.52 |
| Sample 118 | N/A | N/A   |
| Sample 119 | N/A | 31.62 |
| Sample 120 | N/A | N/A   |
| NTC        | N/A | N/A   |
| NRTC       | N/A | N/A   |
| NPR        | N/A | N/A   |
